# Supplementary material for: Modulation of Gut Microbiota by Lonicera caerulea L. Berry Polyphenols in a Mouse Model of Fatty Liver Induced by High Fat Diet
Source: MDPI journal article supplement (doi:10.3390/molecules23123213), 2018-12-05
Supplement: s1 [file s1]

**Supplementary Materials:** The following are available online. Table S1: Dietary composition of each group; Figure S1: HPLC profiles of phenolic components in LCBP; Figure S2: The effect of LCBP on the relative abundance of *Akkermansia*. ND, normal diet; HFD, high fat diet; LCBP, *Lonicera caerulea* L. berry polyphenols.

**Table S1.** Dietary composition of each group.

| Components (%)          | ND     | ND + 1%<br>LCBP | HFD    | HFD + 0.5%<br>LCBP | HFD + 1%<br>LCBP |
|-------------------------|--------|-----------------|--------|--------------------|------------------|
| Lard                    | 6      | 6               | 40     | 40                 | 40               |
| Casein                  | 21     | 21              | 21     | 21                 | 21               |
| Sucrose                 | 10     | 10              | 10     | 10                 | 10               |
| Cellulose               | 4      | 4               | 4      | 4                  | 4                |
| Mineral mix             | 3.5    | 3.5             | 3.5    | 3.5                | 3.5              |
| Vitamin mix             | 1      | 1               | 1      | 1                  | 1                |
| Choline chloride        | 0.2    | 0.2             | 0.2    | 0.2                | 0.2              |
| Methionine              | 0.3    | 0.3             | 0.3    | 0.3                | 0.3              |
| Corn starch             | 54     | 53              | 20     | 19.5               | 19               |
| LCBP                    | 0      | 1               | 0      | 0.5                | 1                |
| Total                   | 100    | 100             | 100    | 100                | 100              |
| Calories<br>(kcal/100g) | 377.94 | 374.13          | 555.08 | 553.18             | 551.27           |

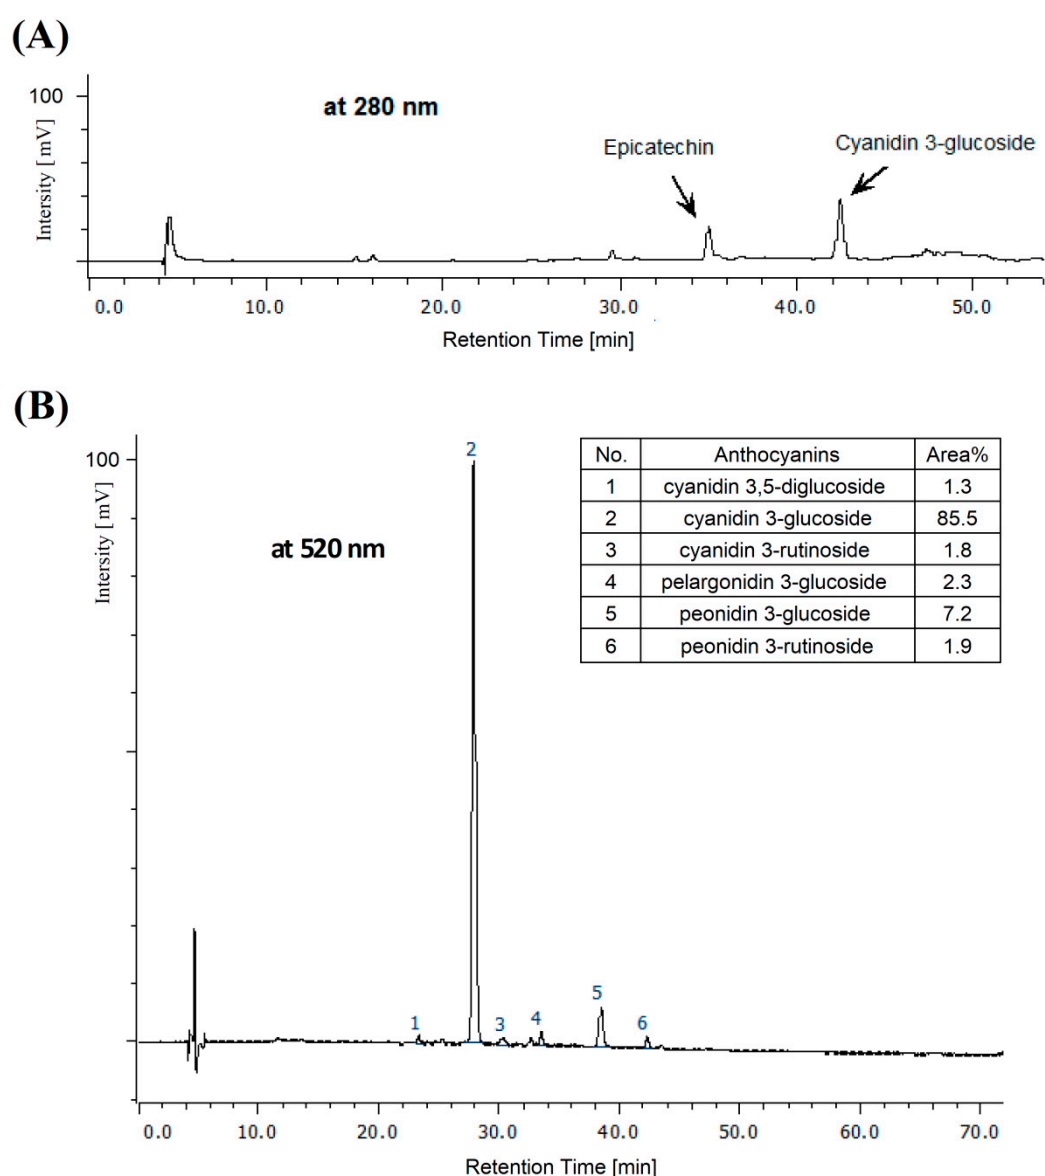

**Figure S1.** HPLC profiles of phenolic components in *Lonicera caerulea* L. berry polyphenols (LCBP). LCBP was analyzed by using a HPLC system as described in the previous study [3]. **(A)** Profile of flavonoids and phenolic acids in LCBP. HPLC was performed at 280 nm. (-)-epicatechin (EC) and cyanidin 3-glucoside (C3G) accounted for 25.5% and 59.5% in the phenolic fraction, respectively. **(B)** Profile of anthocyanins in LCBP. Anthocyanins were detected at 520 nm, and six kinds of anthocyanin were identified with known standards. The diagrams represent the typical pattern of three HPLC profiles. The x and y axis represent retention time and intensity respectively.

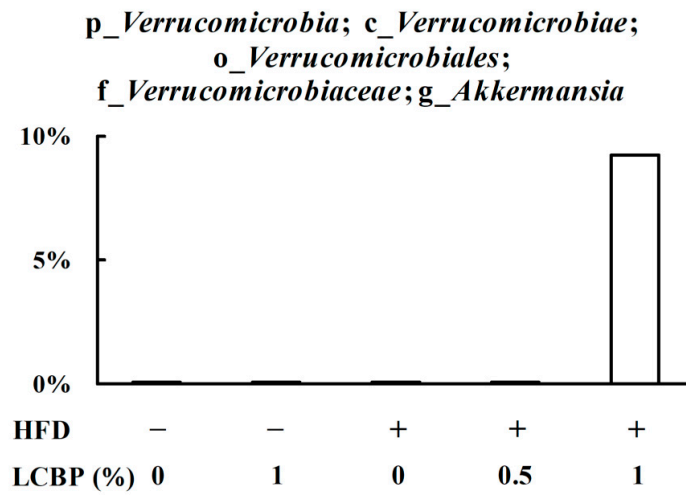

**Figure S2.** The effect of LCBP on the relative abundance of *Akkermansia*. Fecal microbiota were characterized by 16S rRNA gene sequencing, and the data represents the relative abundance of *Akkermansia*. p\_, c\_, o\_, f\_, and g\_ represent phylum, class, order, family, and genus, respectively. HFD, high fat diet; LCBP, *Lonicera caerulea* L. berry polyphenols.
